# Supplementary material for: lncRNA UCA1 Promotes Gefitinib Resistance as a ceRNA to Target FOSL2 by Sponging miR-143 in Non-small Cell Lung Cancer
Source: PubMed Central journal article supplement — Mol Ther Nucleic Acids. 2019 Nov 29;19:643–53. doi: 10.1016/j.omtn.2019.10.047 (PMC6965519; doi:10.1016/j.omtn.2019.10.047), 2019-11-29
Supplement: mmc1.pdf [file mmc1.pdf]

OMTN, Volume 19

## **Supplemental Information**

### **lncRNA UCA1 Promotes Gefitinib Resistance as a ceRNA to Target FOSL2 by Sponging miR-143 in Non-small Cell Lung Cancer**

**Xiliu Chen, Zhongliang Wang, Fan Tong, Xiaorong Dong, Gang Wu, and Ruiguang Zhang**

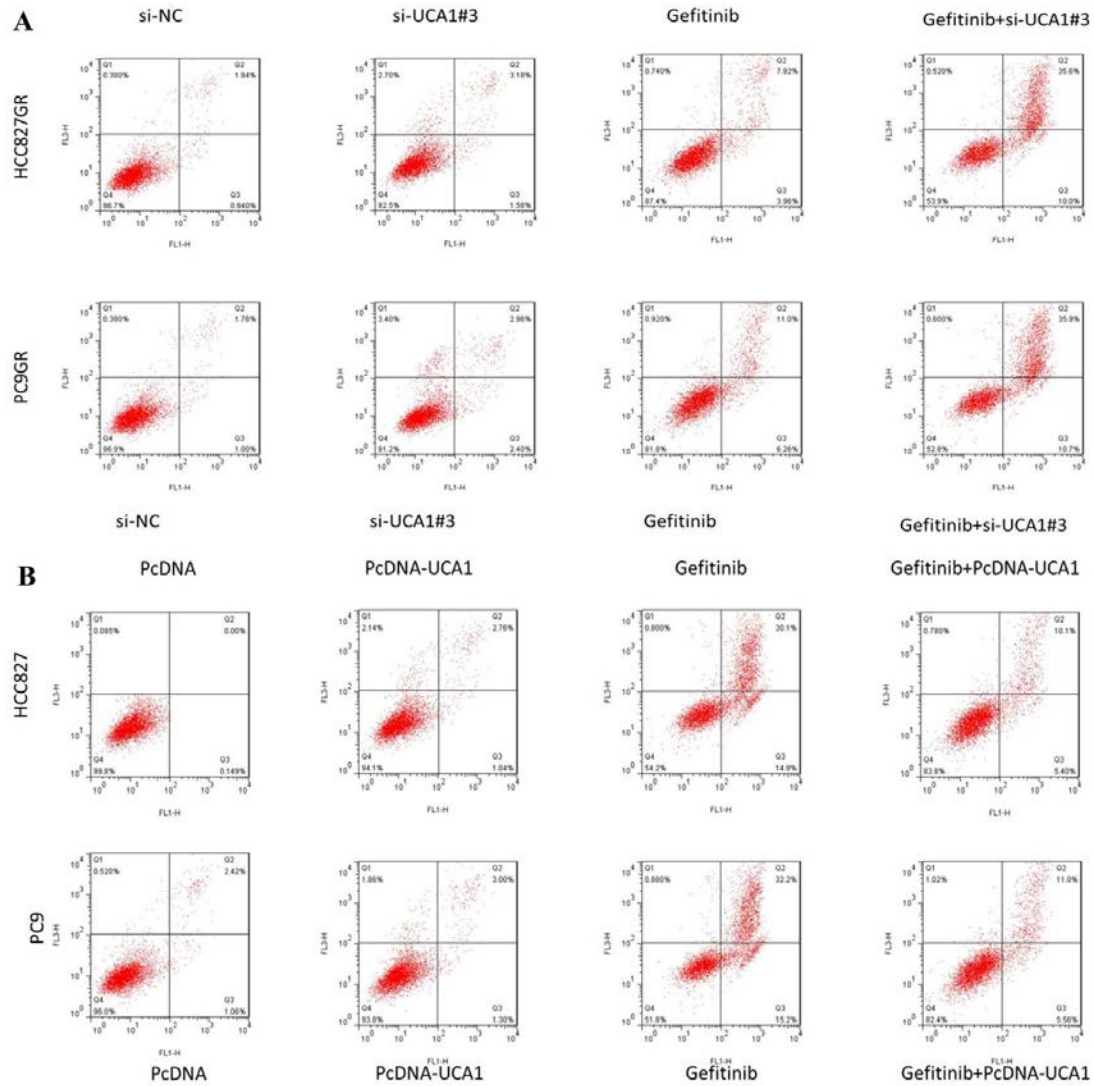

F1S. A. Flow cytometry analysis of apoptosis in PC9GR and HCC827GR cells transfected with si-Control or si-UCA1 prior to the stimulation of 0.1  $\mu$ M gefitinib treatment for 36h; B. Flow cytometry analysis of apoptosis in PC9 and HCC827 cells transfected with pcDNAControl or pcDNA-UCA1 prior to the stimulation of 0.1  $\mu$ M gefitinib treatment for 36h;
